# Supplementary material for: Sexual dimorphism in the mast cell transcriptome and the pathophysiological responses to immunological and psychological stress
Source: PubMed Central journal article supplement (PMC5120457; doi:10.1186/s13293-016-0113-7), 2016-11-22

**FIGURE S1: Basal release of histamine and morphological appearance of female and male BMMCs.**

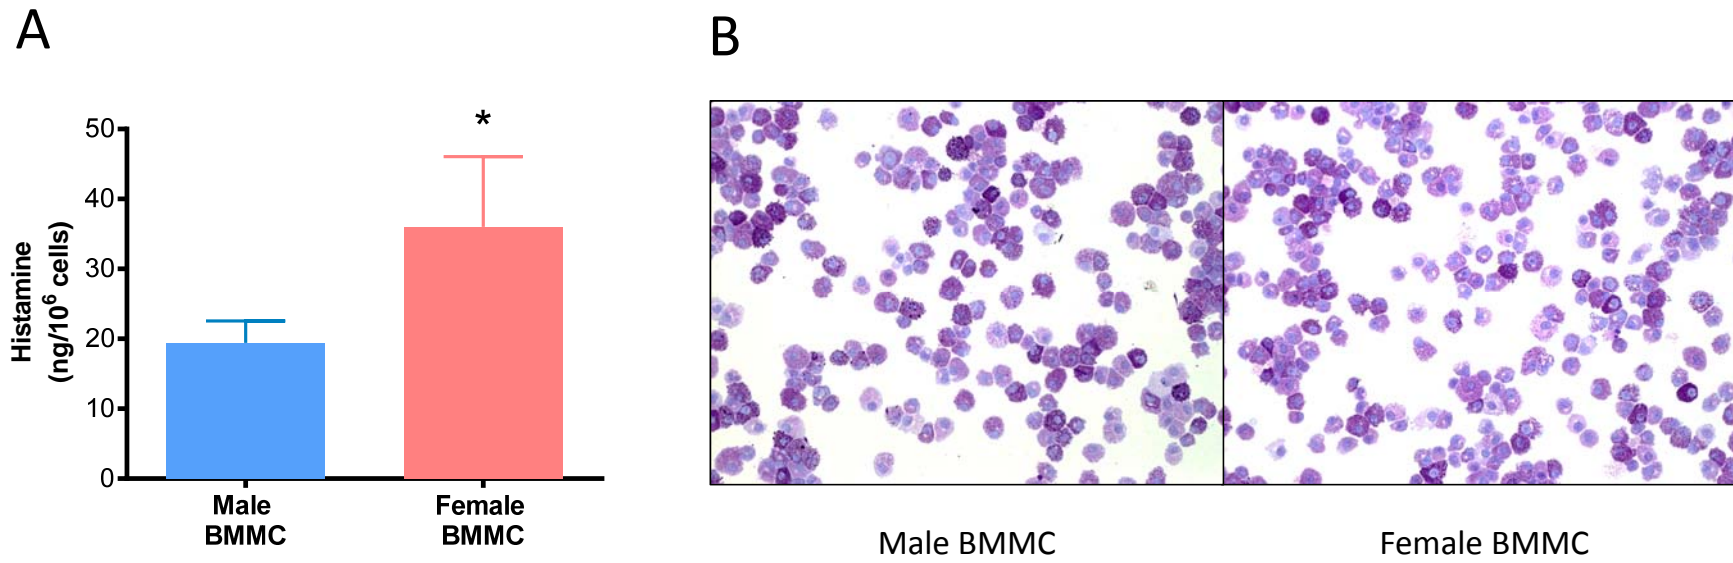

Supplement: 13293_2016_113_MOESM1_ESM.pdf [file 13293_2016_113_MOESM1_ESM.pdf]
