# Supplementary material for: Sexual dimorphism in the mast cell transcriptome and the pathophysiological responses to immunological and psychological stress
Source: PubMed Central journal article supplement (PMC5120457; doi:10.1186/s13293-016-0113-7), 2016-11-22

Figure S4: *Tnf* and *Tph1* gene expression in female and male BMMCs.

A

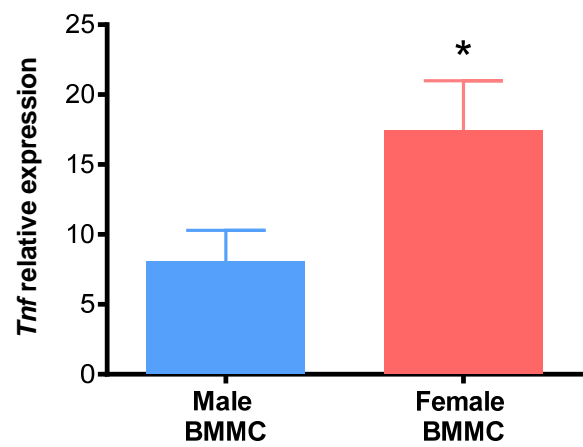

B

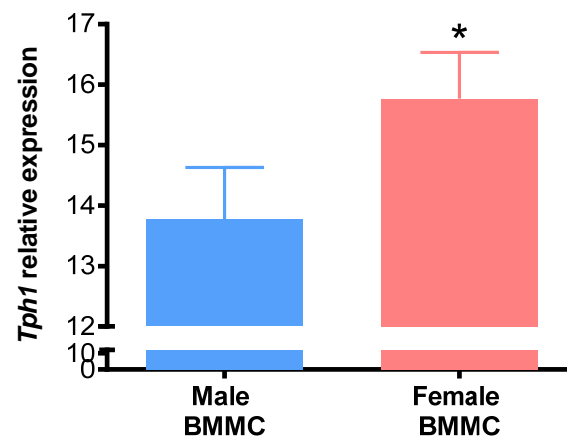

Supplement: 13293_2016_113_MOESM4_ESM.pdf [file 13293_2016_113_MOESM4_ESM.pdf]
